# Supplementary material for: Preparation of a nanoporous Cu–Ag solid solution with enhanced sono-Fenton-like catalytic activity
Source: Royal Society of Chemistry journal article supplement (doi:10.1039/c9ra03247a), 2019-01-01
Supplement: c9ra03247a1.pdf [file c9ra03247a1.pdf]

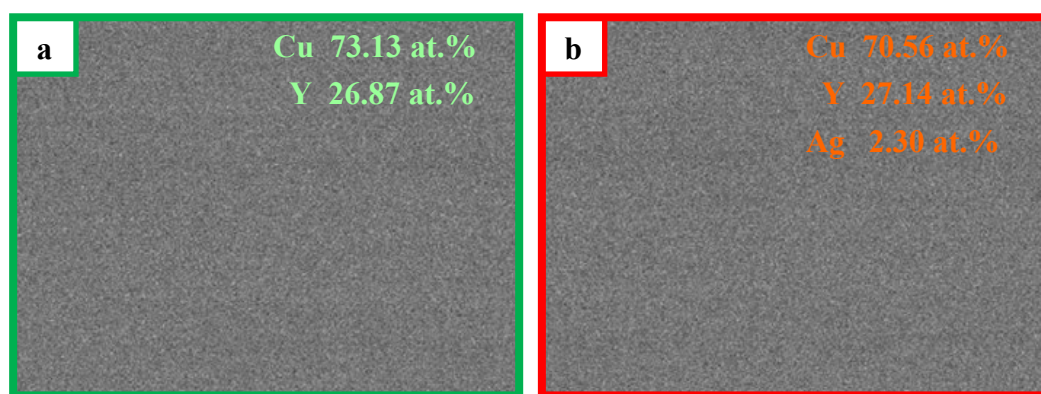

**Fig. S1.** SEM images and the corresponding EDS results of the samples: (a)  $\text{Cu}_{72}\text{Y}_{28}$  metallic glasses, (b)  $\text{Cu}_{70}\text{Y}_{28}\text{Ag}_2$  metallic glasses.

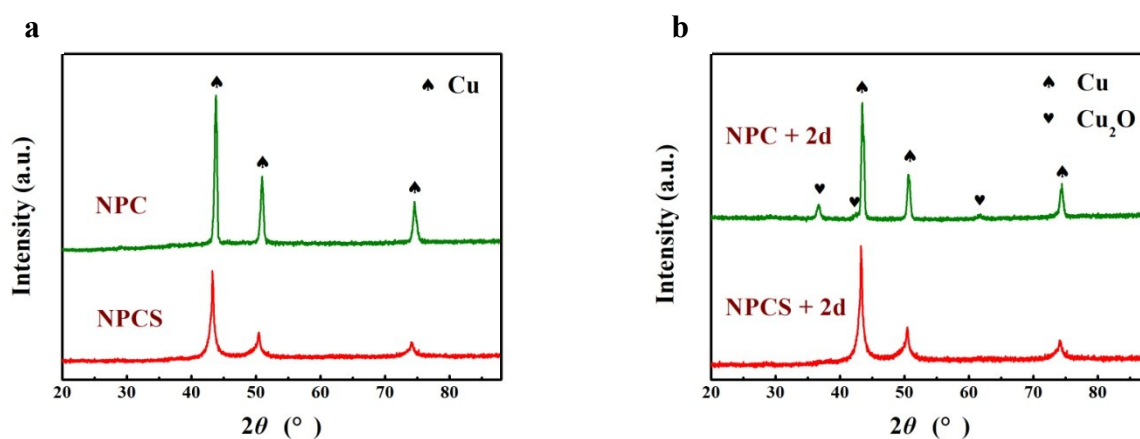

**Fig. S2.** XRD patterns of the dealloying samples which aged in air for (a) 0 days, (b) 2 days.

**Table S1.** The concentration of metal ion in solution after the sono-catalytic reaction.

|      | Cu    | Ag    | Y |
|------|-------|-------|---|
| NPC  | 0.042 | -     | - |
| NPCS | 0.034 | 0.006 | - |
